# Supplementary material for: Enhanced fluorescence properties of terbium complex/poly-l-lactic acid superfine fibers sensitized by the LSPR effect of silver nanoparticles
Source: Royal Society of Chemistry journal article supplement (doi:10.1039/c7ra02401k), 2017-01-01
Supplement: c7ra02401k1.pdf [file c7ra02401k1.pdf]

## Supporting Information

### Enhanced fluorescence properties of terbium complex/poly-L-lactic acid superfine fibers sensitized by the LSPR effect of silver nanoparticles

Shipeng Wen,<sup>a</sup> Guiming Zhang,<sup>a</sup> Rong Zhang,<sup>a</sup> Liqun Zhang<sup>a</sup> and Li Liu<sup>\*ab</sup>

a. Beijing Engineering Research Centre of Advanced Elastomers, Beijing University of Chemical Technology, Beijing 100029, China.

b. State Key Laboratory of Chemical Resource Engineering, Beijing University of Chemical Technology, Beijing 100029, China

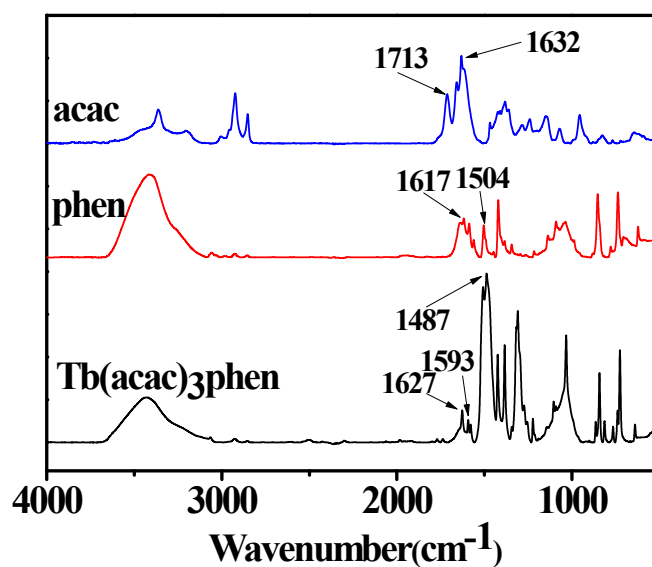

Fig. S1 FT-IR of Tb(acac)<sub>3</sub>phen

FT-IR spectra of the Tb-complex particles are shown in Fig. S1. In the curve for acac, the peaks at 1632 cm<sup>-1</sup> and 1713 cm<sup>-1</sup> are attributed to the stretching vibration peak and saturated chain ketone of C=O group, respectively. After the reaction, the peak at 1713cm<sup>-1</sup> disappear and the peak at 1632cm<sup>-1</sup> shifts to 1627 cm<sup>-1</sup>, indicating that Tb<sup>3+</sup> ions have a coordination reaction with C=O. In the curve for phen, the peaks at 1504cm<sup>-1</sup> and 1617cm<sup>-1</sup> are attributed to skeleton vibrational peak of C-C and C-N, respectively. After the reaction, these two characteristic peaks blue shift to 1487 cm<sup>-1</sup> and 1593 cm<sup>-1</sup>, showing that bidentate coordination between two nitrogen atoms of

phen and  $Tb^{3+}$  and phen occurred.
